# Supplementary material for: Towards Identifying and Reducing the Bias of Disease Information Extracted from Search Engine Data
Source: PubMed Central journal article supplement (PMC4894584; doi:10.1371/journal.pcbi.1004876), 2016-06-06
Supplement: pcbi.1004876.s004.pdf [file pcbi.1004876.s004.pdf]

| <b>Chinese</b> | <b>English</b>                             | <b>Chinese</b> | <b>English</b>                                  |
|----------------|--------------------------------------------|----------------|-------------------------------------------------|
| 手足口病症状         | HFMD symptoms                              | 手足口病           | HFMD                                            |
| 手足口病吃什么药       | What medicines should HFMD (patients) take | 手足口病用什么药       | What medicines should HFMD (patients) use       |
| Ev71病毒         | Ev71 virus                                 | Ev71           | Ev71                                            |
| 肠道病毒           | Enterovirus                                | 如何预防手足口病       | How to prevent HFMD                             |
| 手足口病防治指南       | The guide to preventing and treating HFMD  | 手足口病预防控制指南     | The guide to preventing and controlling HFMD    |
| 口腔溃疡           | Mouth ulcer                                | 疱疹             | Herpes                                          |
| 儿童手足口病         | HFMD in children                           | 小儿手足口病         | Pediatric HFMD                                  |
| 怎样预防手足口病       | How to prevent HFMD                        | 宝宝口腔溃疡怎么办      | What should I do if (my) baby has a mouth ulcer |
| 手足口病症状图片       | Photos of HFMD symptoms                    | 手足口病的预防        | Prevention of HFMD                              |
| 手足口病图片         | Photos of HFMD                             | 手足口病 症状        | HFMD and its symptoms                           |
| 手足口病特征         | Characteristics of HFMD                    | 皮疹             | Rash                                            |
