# Supplementary material for: Towards Identifying and Reducing the Bias of Disease Information Extracted from Search Engine Data
Source: PubMed Central journal article supplement (PMC4894584; doi:10.1371/journal.pcbi.1004876), 2016-06-06
Supplement: pcbi.1004876.s005.pdf [file pcbi.1004876.s005.pdf]

| <b>Keywords Class</b> | <b>Chinese</b> | <b>English Meaning</b>                       | <b>Original Corr</b> | <b>Max Cross Corr</b> | <b>Ahead Weeks</b> |
|-----------------------|----------------|----------------------------------------------|----------------------|-----------------------|--------------------|
| General Keywords      | 手足口病症状         | HFMD symptoms                                | 0.79                 | 0.803                 | 1                  |
|                       | 手足口病吃什么药       | What medicines should HFMD (patients) take   | 0.753                | 0.757                 | -1                 |
|                       | 手足口病用什么药       | What medicines should HFMD (patients) use    | 0.645                | 0.645                 | 0                  |
|                       | 丘疹             | Papule                                       | 0.678                | 0.678                 | 0                  |
|                       | 手足口病           | HFMD                                         | 0.587                | 0.603                 | 1                  |
|                       | Ev71病毒         | Ev71 virus                                   | 0.719                | 0.719                 | 0                  |
| Treatment Keywords    | Ev71           | Ev71                                         | 0.572                | 0.602                 | 1                  |
|                       | 肠道病毒           | Enterovirus                                  | 0.577                | 0.601                 | 1                  |
| Prevention Keywords   | 如何预防手足口病       | How to prevent HFMD                          | 0.697                | 0.706                 | 1                  |
|                       | 手足口病防治指南       | The guide to preventing and treating HFMD    | 0.678                | 0.69                  | 1                  |
|                       | 手足口病预防控制指南     | The guide to preventing and controlling HFMD | 0.456                | 0.62                  | 5                  |
