# Supplementary material for: Towards Identifying and Reducing the Bias of Disease Information Extracted from Search Engine Data
Source: PubMed Central journal article supplement (PMC4894584; doi:10.1371/journal.pcbi.1004876), 2016-06-06
Supplement: pcbi.1004876.s006.pdf [file pcbi.1004876.s006.pdf]

---

| City      | Corr | City             | Corr | City             | Corr |
|-----------|------|------------------|------|------------------|------|
| Guangzhou | 0.69 | Yunfu            | 0.65 | <b>Shantou</b>   | 0.85 |
| Foshan    | 0.78 | Zhuhai           | 0.72 | <b>Huizhou</b>   | 0.79 |
| Yangjiang | 0.63 | Zhaoqing         | 0.76 | <b>Heyuan</b>    | 0.79 |
| Chaozhou  | 0.70 | Zhongshan        | 0.71 | <b>Jiangmeng</b> | 0.82 |
| Shenzhen  | 0.67 | <b>Shaoguang</b> | 0.80 | <b>Meizhou</b>   | 0.80 |
| Zhanjiang | 0.76 | <b>Maoming</b>   | 0.79 | <b>Qingyuan</b>  | 0.84 |
| Dongguan  | 0.71 | <b>Shanwei</b>   | 0.83 | <b>Jieyang</b>   | 0.82 |

---
